# Supplementary material for: Investigating the Intention to Receive the COVID-19 Vaccination in Macao: Implications for Vaccination Strategies
Source: Research Square preprint supplement (doi:10.21203/rs.3.rs-778056/v1), 2021-08-16
Supplement: Supplementary file 1 [file e952bc5aed655e62d161c0a4.docx]

| **Table 1: Respondents' demographic information (n=552)** | | | | | | | | | | | | |
| --- | --- | --- | --- | --- | --- | --- | --- | --- | --- | --- | --- | --- |
| **Demographic information** | | **n** | **%** | **Intention to receive COVID-19 vaccination** | | | | | | **X2** | ***P*** |
| **Negative n=102 18.5%** | | **Not decided n=106 19.2%** | | **Positive n=344  62.3%** | |  |  |
|
| **n** | **%** | **n** | **%** | **n** | **%** |
| Age  (years old) | 18-24 | 35 | 6.3% | 9 | 25.7% | 3 | 8.6% | 23 | 65.7% | 21.97 | ***<0.05*** |
| 25-34 | 139 | 25.2% | 34 | 24.5% | 25 | 18.0% | 80 | 57.6% |
| 35-44 | 157 | 28.4% | 30 | 19.1% | 29 | 18.5% | 98 | 62.4% |
| 45-54 | 143 | 25.9% | 23 | 16.1% | 38 | 26.6% | 82 | 57.3% |
| 55-64 | 55 | 10.0% | 5 | 9.1% | 6 | 10.9% | 44 | 80.0% |
| 65+ | 23 | 4.2% | 1 | 4.3% | 5 | 21.7% | 17 | 73.9% |
| Gender | Male | 224 | 40.6% | 35 | 15.6% | 34 | 15.2% | 155 | 69.2% | 7.70 | ***<0.05*** |
| Female | 328 | 59.4% | 67 | 20.4% | 72 | 22.0% | 189 | 57.6% |
| Type of residency | Macao residents | 413 | 74.8% | 84 | 20.3% | 88 | 21.3% | 241 | 58.4% | 25.88 | ***<0.001*** |
| Non-residents  (worker) | 75 | 13.6% | 12 | 16.0% | 13 | 17.3% | 50 | 66.7% |
| Non-residents (student) | 48 | 8.7% | 2 | 4.2% | 2 | 4.2% | 44 | 91.7% |
| Non-residents (other) | 9 | 1.6% | 1 | 11.1% | 3 | 33.3% | 5 | 55.6% |
| None of the above | 7 | 1.3% | 3 | 42.9% | 0 | 0.0% | 4 | 57.1% |
| Marital status | Married | 336 | 60.9% | 55 | 16.4% | 70 | 20.8% | 211 | 62.8% | 7.32 | 0.293 |
| Cohabitant | 25 | 4.5% | 7 | 28.0% | 5 | 20.0% | 13 | 52.0% |
| Single | 171 | 31.0% | 37 | 21.6% | 25 | 14.6% | 109 | 63.7% |
| Widowed or divorced | 20 | 3.6% | 3 | 15.0% | 6 | 30.0% | 11 | 55.0% |
| Highest level of education completed | Secondary education or below | 65 | 11.8% | 11 | 16.9% | 22 | 33.8% | 32 | 49.2% | 27.67 | ***<0.001*** |
| Bachelor degree | 267 | 48.4% | 60 | 22.5% | 58 | 21.7% | 149 | 55.8% |
| Master degree or above | 220 | 39.9% | 31 | 14.1% | 26 | 11.8% | 163 | 74.1% |
| Being a parent | No | 220 | 39.9% | 53 | 24.1% | 36 | 16.4% | 131 | 59.5% | 8.22 | ***<0.05*** |
| Yes | 332 | 60.1% | 49 | 14.8% | 70 | 21.1% | 213 | 64.2% |
| Living status | Living alone | 61 | 11.1% | 7 | 11.5% | 8 | 13.1% | 46 | 75.4% | 5.03 | 0.081 |
| Living with other people | 491 | 88.9% | 95 | 19.3% | 98 | 20.0% | 298 | 60.7% |
| Estimated number of entries and exits to Macau within the next 6 months | 0 | 196 | 35.5% | 45 | 23.0% | 52 | 26.5% | 99 | 50.5% | 24.91 | ***<0.05*** |
| At least once every 3 months | 199 | 36.1% | 33 | 16.6% | 34 | 17.1% | 132 | 66.3% |
| At least once a month | 112 | 20.3% | 17 | 15.2% | 18 | 16.1% | 77 | 68.8% |
| At least once a week | 37 | 6.7% | 7 | 18.9% | 2 | 5.4% | 28 | 75.7% |
| At least once a day | 8 | 1.4% | 0 | 0.0% | 0 | 0.0% | 8 | 100.0% |
