# Supplementary material for: Investigating the Intention to Receive the COVID-19 Vaccination in Macao: Implications for Vaccination Strategies
Source: Research Square preprint supplement (doi:10.21203/rs.3.rs-778056/v1), 2021-08-16
Supplement: Supplementary file 3 [file f5d95f6510cec680b8669578.docx]

| **Table 3. Results of multiple regression analysis** | | | | | | |
| --- | --- | --- | --- | --- | --- | --- |
| **Model 1 (Control varibles only)** | | | | | | |
| **Variables** | | **Unstandardized Coefficients** | | **Standardized Coefficients Beta** | **t** | **Sig.** |
| **B** | **Std. Error** |
| **(Constant)** | | **1.439** | **0.440** |  | **3.272** | **0.001** |
| **Control variables** | |  |  |  |  |  |
| Age (years old) | | **0.246** | **0.051** | **0.214** | **4.827** | **0.000** |
| Gender | | **-0.244** | **0.117** | **-0.085** | **-2.081** | **0.038** |
| Type of residency | | **0.319** | **0.075** | **0.184** | **4.230** | **0.000** |
| Highest educational level | | **0.373** | **0.087** | **0.175** | **4.291** | **0.000** |
| Being a parent | | 0.081 | 1.749 | 0.081 | 0.075 | 0.749 |
| Estimated number of entries and exits to Macau in the next 6 months | | **0.222** | **0.059** | **0.154** | **3.733** | **0.000** |
| **F =13.559, d.f. = 5, P < 0.001, R = 0.332, R2 = 0.110, adjusted R2 = 0.102** | | | | | | |
|  |  |  |  |  |  |  |
| **Model 2 (PMT constructs, and control variables)** | | | | | | |
| **Variables** | | **Unstandardized Coefficients** | | **Standardized Coefficients Beta** | **t** | **Sig.** |
| **B** | **Std. Error** |
| **(Constant)** | | **0.842** | **0.265** |  | **3.178** | **0.002** |
| **PMT constructs and other factors** | |  |  |  |  |  |
| Perceived Severity | *COVID-19 can be a life-threatening illness.* | -.045i | -1.356 | 0.176 | -0.058 | 0.898 |
| Perceived susceptability | *The risk for me to catch COVID-19 is high.* | **0.126** | **0.037** | **0.111** | **3.395** | **0.001** |
| Maladaptive response rewards | *If I do not get a COVID-19 vaccination, I will not have to worry about the safety of the vaccine.* | **-0.140** | **0.035** | **-0.134** | **-3.952** | **0.000** |
| *If I do not get a COVID-19 vaccination, I will not have to spend time getting vaccinated.* | -.062i | -1.414 | 0.158 | -0.061 | 0.520 |
| *If I do not get a COVID-19 vaccination, I will not have to spend money getting vaccinated.* | **0.088** | **0.043** | **0.069** | **2.063** | **0.040** |
| Self efficacy | *I am confident about my ability to make an informed decision about COVID-19 vaccination.* | .060i | 1.247 | 0.213 | 0.054 | 0.431 |
| *I have the necessary information to decide whether to vaccinate against COVID-19 vaccination.* | **0.132** | **0.049** | **0.107** | **2.704** | **0.007** |
| *I know how to register to get COVID-19 vaccination.* | -.036i | -0.749 | 0.454 | -0.032 | 0.422 |
| *I am able to make arrangement to get COVID-19 vaccination.* | **0.499** | **0.046** | **0.430** | **10.803** | **0.000** |
| Response efficacy | *Having a COVID-19 vaccination would help reduce the symptoms if ever I contracted the disease.* | .041i | 0.861 | 0.390 | 0.037 | 0.431 |
| *Having a COVID-19 vaccination would help reduce the severity of symptoms if ever I contracted the disease.* | -.003i | -0.048 | 0.961 | -0.002 | 0.289 |
| *Having a COVID-19 vaccination would help reduce the risk of death if ever I contracted the disease.* | **0.182** | **0.041** | **0.155** | **4.417** | **0.000** |
| Response cost | *It is likely that I will have serious side-effects that I cannot bear from COVID-19 vaccination.* | **-0.210** | **0.038** | **-0.182** | **-5.513** | **0.000** |
| **Control variables** | |  |  |  |  |  |
| Age (years old) | | .057i | 1.727 | 0.085 | 0.074 | 0.901 |
| Gender | | -.022i | -0.678 | 0.498 | -0.029 | 0.933 |
| Type of residency | | .057i | 1.761 | 0.079 | 0.075 | 0.938 |
| Highest educational level | | -.002i | -0.045 | 0.964 | -0.002 | 0.900 |
| Being a parent | | .045i | 1.394 | 0.164 | 0.060 | 0.942 |
| Estimated number of entries and exits to Macau in the next 6 months | | **0.133** | **0.046** | **0.092** | **2.872** | **0.004** |
| **F =57.402, d.f. = 8, P < 0.001, R = 0.677, R2 = 0.458, adjusted R2 = 0.450** | | | | | | |
|  |  |  |  |  |  |  |
| **Model 3 (PMT constructs and other factors, and control variables)** | | | | | | |
| **Variables** | | **Unstandardized Coefficients** | | **Standardized Coefficients Beta** | **t** | **Sig.** |
| **B** | **Std. Error** |
| **(Constant)** | | **0.057** | **0.271** |  | **0.209** | **0.834** |
| **PMT constructs and other factors** | |  |  |  |  |  |
| Perceived Severity | *COVID-19 can be a life-threatening illness.* | -.033j | -1.124 | 0.261 | -0.048 | 0.911 |
| Perceived susceptability | *The risk for me to catch COVID-19 is high.* | **0.086** | **0.033** | **0.076** | **2.607** | **0.009** |
| Maladaptive response rewards | *If I do not get a COVID-19 vaccination, I will not have to worry about the safety of the vaccine.* | **-0.085** | **0.030** | **-0.082** | **-2.808** | **0.005** |
| *If I do not get a COVID-19 vaccination, I will not have to spend time getting vaccinated.* | -.012j | -0.374 | 0.708 | -0.016 | 0.768 |
| *If I do not get a COVID-19 vaccination, I will not have to spend money getting vaccinated.* | .041j | 1.386 | 0.166 | 0.059 | 0.880 |
| Self efficacy | *I am confident about my ability to make an informed decision about COVID-19 vaccination.* | .064j | 1.819 | 0.069 | 0.078 | 0.631 |
| *I have the necessary information to decide whether to vaccinate against COVID-19 vaccination.* | .051j | 1.412 | 0.159 | 0.061 | 0.603 |
| *I know how to register to get COVID-19 vaccination.* | .016j | 0.403 | 0.687 | 0.017 | 0.470 |
| *I am able to make arrangement to get COVID-19 vaccination.* | **0.386** | **0.040** | **0.333** | **9.666** | **0.000** |
| Response efficacy | *Having a COVID-19 vaccination would help reduce the symptoms if ever I contracted the disease.* | -.018j | -0.541 | 0.589 | -0.023 | 0.672 |
| *Having a COVID-19 vaccination would help reduce the severity of symptoms if ever I contracted the disease.* | -.014j | -0.429 | 0.668 | -0.018 | 0.683 |
| *Having a COVID-19 vaccination would help reduce the risk of death if ever I contracted the disease.* | .006j | 0.192 | 0.848 | 0.008 | 0.692 |
| Response cost | *It is likely that I will have serious side-effects that I cannot bear from COVID-19 vaccination.* | **-0.143** | **0.035** | **-0.124** | **-4.139** | **0.000** |
| Social attitudes | *Getting COVID-19 vaccination helps to reduce the risk of my family contracting COVID-19.* | .051j | 1.384 | 0.167 | 0.059 | 0.564 |
| *Getting COVID-19 vaccination helps to prevent the diffusion of COVID-19 in the community.* | .003j | 0.071 | 0.943 | 0.003 | 0.471 |
| Social norm | *I consider getting COVID-19 vaccination a social responsibility.* | **0.393** | **0.044** | **0.326** | **8.939** | **0.000** |
| *People I know have been already received COVID-19 vaccination.* | .003j | 0.094 | 0.925 | 0.004 | 0.648 |
| *Most people I know would expect me to get COVID-19 vaccination.* | **0.126** | **0.039** | **0.114** | **3.236** | **0.001** |
| Past experience | *I have bad experiences with other types of vaccines before.* | -.046j | -1.559 | 0.119 | -0.067 | 0.901 |
| Information seeking behaviour | *I have actively sought information about COVID-19 vaccination.* | .040j | 1.206 | 0.228 | 0.052 | 0.697 |
| *I rely on the government (such as the Health Bureau) for accurate information about COVID-19 vaccination.* | -.018j | -0.594 | 0.553 | -0.026 | 0.810 |
| *I rely on healthcare professionals (such as doctors, pharmacists, nurses) for accurate information about COVID-19 vaccination.* | .008j | 0.262 | 0.793 | 0.011 | 0.834 |
| *I rely on online sources (such as internet, social media) for accurate information about COVID-19 vaccination.* | **-0.080** | **0.038** | **-0.065** | **-2.095** | **0.037** |
| *I rely on my family and friends for accurate information about COVID-19 and COVID-19 vaccination.* | -.006j | -0.196 | 0.845 | -0.008 | 0.865 |
| Facilitating factors | *I might have a stronger intention to take COVID-19 vaccination if people I know have done so.* | .025j | 0.691 | 0.490 | 0.030 | 0.591 |
| *I might have a stronger intention to take COVID-19 vaccination if that somehow helps to lift travel restrictions.* | -.031j | -0.828 | 0.408 | -0.036 | 0.543 |
| *I might have a stronger intention to take COVID-19 vaccination if there is a rewarding system such as time off from work.* | **0.160** | **0.030** | **0.169** | **5.345** | **0.000** |
| *I might have a stronger intention to take COVID-19 vaccination if there is financial incentive.* | .060j | 1.255 | 0.210 | 0.054 | 0.337 |
| **Control variables** | |  |  |  |  |  |
| Age (years old) | | **0.090** | **0.034** | **0.078** | **2.627** | **0.009** |
| Gender | | -.045j | -1.583 | 0.114 | -0.068 | 0.963 |
| Type of residency | | .047j | 1.546 | 0.123 | 0.066 | 0.820 |
| Highest educational level | | .007j | 0.237 | 0.813 | 0.010 | 0.894 |
| Being a parent | | .016j | 0.500 | 0.617 | 0.021 | 0.753 |
| Estimated number of entries and exits to Macau in the next 6 months | | .036j | 1.249 | 0.212 | 0.054 | 0.914 |
| **F =82.923, d.f. = 9, P < 0.001, R = 0.761, R2 = 0.579, adjusted R2 = 0.572** | | | | | | |
