# Supplementary material for: Investigating the Intention to Receive the COVID-19 Vaccination in Macao: Implications for Vaccination Strategies
Source: Research Square preprint supplement (doi:10.21203/rs.3.rs-778056/v1), 2021-08-16
Supplement: Supplementary file 4 [file 3848a0becdabbe284a4a2337.docx]

| **Table 2. Measurement of variables and other factors** | | | | | | | | | | | | | | | |
| --- | --- | --- | --- | --- | --- | --- | --- | --- | --- | --- | --- | --- | --- | --- | --- |
|  | | **Mean** | **S/D** | **Frequency** | | | | | | | | | | **Association with Intention to get COVID-19 vaccination** | |
| Strongly disagree | | Disagree | | Not sure | | Agree | | Strongly agree | | Spearman's rho | *P* |
| n | % | n | % | n | % | n | % | n | % |  |  |
| **Dependent variables** | | | | | | | | | | | | | |  |  |
| Intention | *I intend to have COVID-19 vaccination.* | 3.83 | 1.41 | 63 | 11% | 39 | 7% | 106 | 19% | 62 | 11% | 282 | 51% |  |  |
| **PMT variables and other factors** | | | | | | | | | | | | | | | |
| Severity | *COVID-19 can be a life-threatening illness.* | 3.82 | 1.47 | 78 | 14% | 39 | 7% | 68 | 12% | 82 | 15% | 285 | 52% | 0.120 | ***<0.05*** |
| Susceptibility | *The risk for me to catch COVID-19 is high.* | 2.49 | 1.24 | 146 | 26% | 146 | 26% | 158 | 29% | 48 | 9% | 54 | 10% | 0.148 | ***<0.001*** |
| Maladaptive response rewards *(Cronbach’s alpha 0.701)* | *If I do not get a COVID-19 vaccination, I will not have to worry about the safety of the vaccine.* | 2.63 | 1.35 | 154 | 28% | 102 | 18% | 168 | 30% | 50 | 9% | 78 | 14% | -0.215 | ***<0.001*** |
| *If I do not get a COVID-19 vaccination, I will not have to spend time getting vaccinated.* | 2.04 | 1.17 | 252 | 46% | 114 | 21% | 131 | 24% | 24 | 4% | 31 | 6% | -0.173 | ***<0.001*** |
| *If I do not get a COVID-19 vaccination, I will not have to spend money getting vaccinated.* | 1.72 | 1.1 | 337 | 61% | 96 | 17% | 78 | 14% | 16 | 3% | 25 | 5% | -0.610 | 0.154 |
| Self-efficacy  *(Cronbach's alpha = 0.865)* | *I am confident about my ability to make an informed decision about COVID-19 vaccination.* | 4.12 | 1.08 | 19 | 3% | 25 | 5% | 99 | 18% | 133 | 24% | 276 | 50% | 0.468 | ***<0.001*** |
| *I have the necessary information to decide whether to vaccinate against COVID-19 vaccination.* | 4.01 | 1.14 | 26 | 5% | 32 | 6% | 105 | 19% | 135 | 24% | 254 | 46% | 0.464 | ***<0.001*** |
| *I know how to register to get COVID-19 vaccination.* | 4.41 | 1.02 | 23 | 4% | 11 | 2% | 47 | 9% | 109 | 20% | 362 | 66% | 0.442 | ***<0.001*** |
| *I am able to make arrangement to get COVID-19 vaccination.* | 4.14 | 1.22 | 36 | 7% | 31 | 6% | 65 | 12% | 107 | 19% | 313 | 57% | 0.613 | ***<0.001*** |
| Response efficacy *(Cronbach's alpha = 0.921)* | *Having a COVID-19 vaccination would help reduce the symptoms if ever I contracted the disease.* | 3.68 | 1.22 | 47 | 9% | 42 | 8% | 116 | 21% | 180 | 33% | 167 | 30% | 0.357 | ***<0.001*** |
| *Having a COVID-19 vaccination would help reduce the severity of symptoms if ever I contracted the disease.* | 3.76 | 1.17 | 38 | 7% | 38 | 7% | 118 | 21% | 185 | 34% | 173 | 31% | 0.358 | ***<0.001*** |
| *Having a COVID-19 vaccination would help reduce the risk of death if ever I contracted the disease.* | 3.72 | 1.2 | 43 | 8% | 42 | 8% | 114 | 21% | 182 | 33% | 171 | 31% | 0.371 | ***<0.001*** |
| Response cost | *It is likely that I will have serious side-effects that I cannot bear from COVID-19 vaccination.* | 3.07 | 1.22 | 71 | 13% | 97 | 18% | 187 | 34% | 116 | 21% | 81 | 15% | -0.235 | ***<0.001*** |
| Social attitudes *(Cronbach's alpha = 0.870)* | *Getting COVID-19 vaccination helps to reduce the risk of my family contracting COVID-19.* | 3.88 | 1.14 | 27 | 5% | 35 | 6% | 128 | 23% | 152 | 28% | 210 | 38% | 0.511 | ***<0.001*** |
| *Getting COVID-19 vaccination helps to prevent the diffusion of COVID-19 in the community.* | 4.09 | 1.06 | 20 | 4% | 26 | 5% | 90 | 16% | 166 | 30% | 250 | 45% | 0.510 | ***<0.001*** |
| Social norm *(Cronbach's alpha = 0.725)* | *I consider getting COVID-19 vaccination a social responsibility.* | 3.99 | 1.17 | 28 | 5% | 31 | 6% | 119 | 22% | 114 | 21% | 260 | 47% | 0.655 | ***<0.001*** |
| *People I know have already received COVID-19 vaccination.* | 4.16 | 1.08 | 18 | 3% | 30 | 5% | 86 | 16% | 127 | 23% | 291 | 53% | 0.319 | ***<0.001*** |
| *Most people I know would expect me to get COVID-19 vaccination.* | 3.47 | 1.28 | 53 | 10% | 65 | 12% | 164 | 30% | 110 | 20% | 160 | 29% | 0.508 | ***<0.001*** |
| Past experience | *I have bad experiences with other types of vaccines before.* | 1.71 | 1.15 | 361 | 65% | 72 | 13% | 65 | 12% | 28 | 5% | 26 | 5% | -0.150 | ***<0.001*** |
| Information seeking behaviour *(Cronbach's alpha = 0.673)* | *I have actively sought information about COVID-19 vaccination.* | 3.48 | 1.26 | 50 | 9% | 65 | 12% | 158 | 29% | 128 | 23% | 151 | 27% | 0.379 | ***<0.001*** |
| *I rely on the government (such as the Health Bureau) for accurate information about COVID-19 vaccination.* | 3.68 | 1.27 | 50 | 9% | 43 | 8% | 132 | 24% | 135 | 24% | 192 | 35% | 0.279 | ***<0.001*** |
| *I rely on healthcare professionals (such as doctors, pharmacists, nurses) for accurate information about COVID-19 vaccination.* | 3.19 | 1.37 | 88 | 16% | 81 | 15% | 150 | 27% | 104 | 19% | 129 | 23% | 0.287 | ***<0.001*** |
| *I rely on online sources (such as internet, social media) for accurate information about COVID-19 vaccination.* | 3.68 | 1.15 | 34 | 6% | 40 | 7% | 156 | 28% | 161 | 29% | 161 | 29% | 0.147 | ***<0.001*** |
| *I rely on my family and friends for accurate information about COVID-19 and COVID-19 vaccination.* | 2.73 | 1.27 | 123 | 22% | 107 | 19% | 179 | 32% | 82 | 15% | 61 | 11% | 0.085 | ***<0.05*** |
| Facilitating factors *(Cronbach's alpha = 0.835)* | *I might have a stronger intention to take COVID-19 vaccination if people I know have done so.* | 3.42 | 1.35 | 74 | 13% | 56 | 10% | 143 | 26% | 122 | 22% | 157 | 28% | 0.376 | ***<0.001*** |
| *I might have a stronger intention to take COVID-19 vaccination if that somehow helps to lift travel restrictions.* | 3.91 | 1.3 | 49 | 9% | 36 | 7% | 92 | 17% | 115 | 21% | 260 | 47% | 0.423 | ***<0.001*** |
| *I might have a stronger intention to take COVID-19 vaccination if there is a rewarding system such as time off from work.* | 3.37 | 1.49 | 102 | 18% | 54 | 10% | 121 | 22% | 86 | 16% | 189 | 34% | 0.358 | ***<0.001*** |
| *I might have a stronger intention to take COVID-19 vaccination if there is financial incentive.* | 3.07 | 1.52 | 135 | 24% | 62 | 11% | 134 | 24% | 68 | 12% | 153 | 28% | 0.265 | ***<0.001*** |
